# Supplementary material for: Emissions and Air Quality Implications of Upstream and Midstream Oil and Gas Operations in Mexico
Source: MDPI journal article supplement (doi:10.3390/atmos12121696), 2021-12-17
Supplement: s1 [file s1]

Archive with 1 entries (1 files):
- atmosphere-1498758-supplementary (1).pdf
