# Supplementary material for: Emissions and Air Quality Implications of Upstream and Midstream Oil and Gas Operations in Mexico
Source: MDPI journal article supplement (doi:10.3390/atmos12121696), 2021-12-17
Supplement: s1 [file s1 › atmosphere-1498758-supplementary (1).pdf]

---

# Emissions and Air Quality Implications of Upstream and Midstream Oil and Gas Operations in Mexico

## Supplemental Information

Elena McDonald-Buller <sup>1,\*</sup>, Gary McGaughey <sup>1</sup>, John Grant <sup>2</sup>, Tejas Shah<sup>2</sup>, Yosuke Kimura<sup>1</sup>, Greg Yarwood<sup>2</sup>

<sup>1</sup> Center for Energy and Environmental Resources, The University of Texas at Austin, 10100 Burnet Road, Building 133, Mail Code R7100, Austin, Texas 78758, United States

<sup>2</sup> Ramboll, 7250 Redwood Boulevard, Suite 105, Novato, California, 94945, United States

\* Correspondence: [ecmb@mail.utexas.edu](mailto:ecmb@mail.utexas.edu)

**Table S1.** Oil and gas activity metrics mapped to EPA emission source classification codes.

| SCC        | Source                                                                    | Well Type | Oil and Gas Activity Metric (annual basis) |
|------------|---------------------------------------------------------------------------|-----------|--------------------------------------------|
| 2310000220 | Drill Rigs                                                                | All       | Spuds                                      |
| 2310000660 | Hydraulic Fracturing Engines                                              | All       | Spuds                                      |
| 2310020600 | Compressor Engines                                                        | All       | Gas Production                             |
| 2310021010 | Storage Tanks: Condensate                                                 | Gas       | Condensate Production                      |
| 2310021030 | Tank Truck/Railcar Loading: Condensate                                    | Gas       | Condensate Production                      |
| 2310021100 | Gas Well Heaters                                                          | Gas       | Active Well Count                          |
| 2310021101 | Natural Gas Fired Two Cycle Lean Burn Compressor Engines < 50 HP          | Gas       | Gas Production                             |
| 2310021102 | Natural Gas Fired Two Cycle Lean Burn Compressor Engines 50 To 499 HP     | Gas       | Gas Production                             |
| 2310021103 | Natural Gas Fired Two Cycle Lean Burn Compressor Engines 500+ HP          | Gas       | Gas Production                             |
| 2310021201 | Natural Gas Fired Four cycle Lean Burn Compressor Engines <50 HP          | Gas       | Gas Production                             |
| 2310021202 | Natural Gas Fired Four cycle Lean Burn Compressor Engines 50 To 499 HP    | Gas       | Gas Production                             |
| 2310021203 | Natural Gas Fired Four cycle Lean Burn Compressor Engines 500+ HP         | Gas       | Gas Production                             |
| 2310021251 | Lateral Compressors 4 Cycle Lean Burn                                     | Gas       | Gas Production                             |
| 2310021300 | Gas Well Pneumatic Devices                                                | Gas       | Active Well Count                          |
| 2310021301 | Natural Gas Fired Four Cycle Rich burn Compressor Engines <50 HP          | Gas       | Gas Production                             |
| 2310021302 | Natural Gas Fired Four Cycle Rich burn Compressor Engines 50 To 499 HP    | Gas       | Gas Production                             |
| 2310021303 | Natural Gas Fired Four Cycle Rich burn Compressor Engines 500+ HP         | Gas       | Gas Production                             |
| 2310021351 | Lateral Compressors Four Cycle Rich burn                                  | Gas       | Gas Production                             |
| 2310021400 | Gas Well Dehydrators                                                      | Gas       | Gas Production                             |
| 2310021401 | Nat Gas Fired Four Cycle Rich Burn Compressor Engines <50 HP w/NSCR       | Gas       | Gas Production                             |
| 2310021402 | Nat Gas Fired Four Cycle Rich Burn Compressor Engines 50 To 499 HP w/NSCR | Gas       | Gas Production                             |
| 2310021403 | Nat Gas Fired Four Cycle Rich Burn Compressor Engines 500+ HP w/NSCR      | Gas       | Gas Production                             |
| 2310021501 | Fugitives: Connectors                                                     | Gas       | Active Well Count                          |
| 2310021502 | Fugitives: Flanges                                                        | Gas       | Active Well Count                          |
| 2310021503 | Fugitives: Open Ended Lines                                               | Gas       | Active Well Count                          |
| 2310021504 | Fugitives: Pumps                                                          | Gas       | Active Well Count                          |

| SCC        | Source                                                 | Well Type | Oil and Gas Activity Metric (annual basis) |
|------------|--------------------------------------------------------|-----------|--------------------------------------------|
| 2310021505 | Fugitives: Valves                                      | Gas       | Active Well Count                          |
| 2310021506 | Fugitives: Other                                       | Gas       | Active Well Count                          |
| 2310021600 | Gas Well Venting                                       | Gas       | Gas Production                             |
| 2310021603 | Gas Well Venting - Blowdowns                           | Gas       | Gas Production                             |
| 2310121100 | Mud Degassing                                          | Gas       | Spuds                                      |
| 2310121401 | Gas Well Pneumatic Pumps                               | Gas       | Active Well Count                          |
| 2310121700 | Gas Well Completion: All Processes                     | Gas       | Spuds                                      |
| 2310021509 | Fugitives: All Processes                               | Gas       | Active Well Count                          |
| 2310000330 | Artificial Lift                                        | Oil       | Active Well Count                          |
| 2310010100 | Oil Well Heaters                                       | Oil       | Active Well Count                          |
| 2310010200 | Oil Well Tanks - Flashing & Standing/Working/Breathing | Oil       | Oil Production                             |
| 2310010300 | Oil Well Pneumatic Devices                             | Oil       | Active Well Count                          |
| 2310011000 | Total: All Processes                                   | Oil       | Total Well Counts                          |
| 2310011020 | Storage Tanks: Crude Oil                               | Oil       | Oil Production                             |
| 2310011100 | Heater Treater                                         | Oil       | Active Well Count                          |
| 2310011201 | Tank Truck/Railcar Loading: Crude Oil                  | Oil       | Oil Production                             |
| 2310011450 | Wellhead                                               | Oil       | Associated Gas Production                  |
| 2310011501 | Fugitives: Connectors                                  | Oil       | Active Well Count                          |
| 2310011502 | Fugitives: Flanges                                     | Oil       | Active Well Count                          |
| 2310011503 | Fugitives: Open Ended Lines                            | Oil       | Active Well Count                          |
| 2310011504 | Fugitives: Pumps                                       | Oil       | Active Well Count                          |
| 2310011505 | Fugitives: Valves                                      | Oil       | Active Well Count                          |
| 2310011506 | Fugitives: Other                                       | Oil       | Active Well Count                          |
| 2310111100 | Mud Degassing                                          | Oil       | Spuds                                      |
| 2310111401 | Oil Well Pneumatic Pumps                               | Oil       | Active Well Count                          |
| 2310111700 | Oil Well Completion: All Processes                     | Oil       | Spuds                                      |
| 2310011500 | Fugitives: All Processes                               | Oil       | Active Well Count                          |

**Table S2.** Emission factors for onshore oil and gas production well sites in the Sabinas and Burgos Basins.

| SCC                    | Source                               |                                     | Emission Factor (lb/surrogate) |       |        |                 |                   |
|------------------------|--------------------------------------|-------------------------------------|--------------------------------|-------|--------|-----------------|-------------------|
|                        |                                      |                                     | NO <sub>x</sub>                | VOC   | CO     | SO <sub>2</sub> | PM <sub>2.5</sub> |
| (lb/MMSCF)             |                                      |                                     |                                |       |        |                 |                   |
| 2310021100             | Gas Well Heaters                     |                                     | 2,303                          | 129   | 2,025  | -               | 184               |
| 2310021400             | Gas Well Dehydrators                 |                                     | 80                             | 2,266 | 282    | 3               | 34                |
| 2310021600             | Gas Well Venting                     |                                     | -                              | 2,541 | -      | -               | -                 |
| 2310021101             | Natural Gas-Fired Compressor Engines | Two Cycle Lean Burn<50HP            | 229                            | 18    | 59     | 0               | 4                 |
| 2310021102             |                                      | Two Cycle Lean Burn50-499HP         | 8,187                          | 745   | 1,075  | 2               | 130               |
| 2310021103             |                                      | Two Cycle Lean Burn500+HP           | 0                              | 0     | 0      | -               | 0                 |
| 2310021201             |                                      | Four Cycle Lean Burn<50HP           | 5                              | -     | 0      | -               | -                 |
| 2310021202             |                                      | Four Cycle Lean Burn50-499HP        | 40                             | 1     | 2      | -               | -                 |
| 2310021203             |                                      | Four Cycle Lean Burn500+HP          | 19,459                         | 806   | 2,730  | 4               | 17                |
| 2310021301             |                                      | Four Cycle Rich Burn<50HP           | 506                            | 5     | 495    | 0               | 2                 |
| 2310021302             |                                      | Four Cycle Rich Burn50-499HP        | 36,266                         | 618   | 28,547 | 6               | 97                |
| 2310021401             |                                      | Four Cycle Rich Burn<50HPw/NSCR     | -                              | -     | -      | -               | -                 |
| 2310021402             |                                      | Four Cycle Rich Burn50-499HP w/NSCR | 625                            | 21    | 173    | 0               | 8                 |
| 2310021403             |                                      | Four Cycle Rich Burn500+HP w/NSCR   | 105,128                        | 1,690 | 16,494 | 4               | 57                |
| (lb/active well count) |                                      |                                     |                                |       |        |                 |                   |
| 2310021501             | Fugitives                            | Connectors                          | -                              | 62    | -      | -               | -                 |
| 2310021502             |                                      | Flanges                             | -                              | 26    | -      | -               | -                 |
| 2310021503             |                                      | Open Ended Lines                    | -                              | 28    | -      | -               | -                 |
| 2310021504             |                                      | Pumps                               | -                              | 43    | -      | -               | -                 |
| 2310021505             |                                      | Valves                              | -                              | 239   | -      | -               | -                 |
| 2310021506             |                                      | Other                               | -                              | 360   | -      | -               | -                 |
| 2310021300             | Gas Well Pneumatic Devices           |                                     | -                              | 1,109 | -      | -               | -                 |
| 2310121401             | Gas Well Pneumatic Pumps             |                                     | -                              | 510   | -      | -               | -                 |
| (lb/spud)              |                                      |                                     |                                |       |        |                 |                   |
| 2310000220             | Drill Rigs                           |                                     | 15,587                         | 2,619 | 9,637  | 1,982           | 1,754             |

---

| SCC        | Source                             | Emission Factor (lb/surrogate) |        |       |                 |                   |
|------------|------------------------------------|--------------------------------|--------|-------|-----------------|-------------------|
|            |                                    | NO <sub>x</sub>                | VOC    | CO    | SO <sub>2</sub> | PM <sub>2.5</sub> |
| 2310000660 | Hydraulic Fracturing Engines       | 14,672                         | 2,317  | 9,170 | 1,353           | 1,834             |
| 2310121700 | Gas Well Completion: All Processes | -                              | 45,866 | -     | -               | -                 |

**Table S3.** Emission factors for onshore oil and gas production well sites in the Sureste, Tampico-Misantla, and Veracruz Basins.

| SCC                        | Source                                |                                     |           | Emission Factor (lb/surrogate) |       |       |                 |                   |
|----------------------------|---------------------------------------|-------------------------------------|-----------|--------------------------------|-------|-------|-----------------|-------------------|
|                            |                                       |                                     | Well Type | NO <sub>x</sub>                | VOC   | CO    | SO <sub>2</sub> | PM <sub>2.5</sub> |
| (lb/bbl)                   |                                       |                                     |           |                                |       |       |                 |                   |
| 2310021010                 | Storage Tanks: Condensate             |                                     | Gas       | -                              | 0.02  | -     | -               | -                 |
| 2310011020                 | Storage Tanks: Crude Oil              |                                     | Oil       | -                              | 7.65  | -     | -               | -                 |
| 2310011201                 | Tank Truck/Railcar Loading: Crude Oil |                                     | Oil       | <0.01                          | 0.11  | <0.01 | -               | -                 |
| (lb/MMSCF)                 |                                       |                                     |           |                                |       |       |                 |                   |
| 2310021400                 | Dehydrators                           |                                     | Gas       | 0.03                           | 0.89  | 0.11  | <0.01           | 0.11              |
| 2310021600                 | Well Venting                          |                                     | Gas       | -                              | 7.97  | -     | -               | -                 |
| 2310021101                 | Natural Gas-Fired Compressor Engines  | Two cycle lean burn < 50 HP         | Gas       | 0.08                           | <0.01 | 0.02  | -               | <0.01             |
| 2310021102                 |                                       | Two cycle lean burn 50 To 499 HP    | Gas       | 3.39                           | 0.31  | 0.44  | -               | 0.05              |
| 2310021203                 |                                       | Four cycle lean burn 500+ HP        | Gas       | 9.82                           | 0.41  | 1.36  | <0.01           | <0.01             |
| 2310021301                 |                                       | Four cycle rich burn <50 HP         | Gas       | 0.18                           | -     | 0.16  | -               | -                 |
| 2310021302                 |                                       | Four cycle rich burn 50 To 499 HP   | Gas       | 13.49                          | 0.23  | 10.66 | <0.01           | 0.04              |
| 2310021403                 |                                       | Four cycle rich burn 500+ HP w/NSCR | Gas       | 38.99                          | 0.63  | 6.10  | <0.01           | 0.02              |
| 2310020600                 |                                       | Compressor Engines                  | All       | 0.03                           | <0.01 | <0.01 | -               | <0.01             |
| (100 lb/active well count) |                                       |                                     |           |                                |       |       |                 |                   |
| 2310021300                 | Pneumatic Devices                     |                                     | Gas       | -                              | 1.27  | -     | -               | -                 |
| 2310121401                 | Pneumatic Pumps                       |                                     | Gas       | -                              | 2.83  | -     | -               | -                 |
| 2310021100                 | Gas Well Heaters                      |                                     | Gas       | 0.73                           | 0.04  | 0.62  | -               | 0.06              |
| 2310021501                 | Fugitives                             | Connectors                          | Gas       | -                              | 0.34  | -     | -               | -                 |

|                |                              |                  |     |       |       |       |       |      |
|----------------|------------------------------|------------------|-----|-------|-------|-------|-------|------|
| 2310021502     |                              | Flanges          | Gas | -     | 0.14  | -     | -     | -    |
| 2310021503     |                              | Open Ended Lines | Gas | -     | 0.16  | -     | -     | -    |
| 2310021504     |                              | Pumps            | Gas | -     | 0.24  | -     | -     | -    |
| 2310021505     |                              | Valves           | Gas | -     | 1.67  | -     | -     | -    |
| 2310021506     |                              | Other            | Gas | -     | 2.00  | -     | -     | -    |
| 2310010300     | Pneumatic Devices            |                  | Oil | -     | 39.29 | -     | -     | -    |
| 2310111401     | Pneumatic Pumps              |                  | Oil | -     | 8.80  | -     | -     | -    |
| 2310000330     | Artificial Lift              |                  | Oil | 22.83 | 0.31  | 35.30 | <0.01 | 0.19 |
| 2310011100     | Heater Treater               |                  | Oil | 0.90  | 0.05  | 0.76  | <0.01 | 0.07 |
| 2310011501     | Fugitives                    | Connectors       | Oil | -     | 4.36  | -     | -     | -    |
| 2310011502     |                              | Flanges          | Oil | -     | 1.01  | -     | -     | -    |
| 2310011503     |                              | Open Ended Lines | Oil | -     | 1.64  | -     | -     | -    |
| 2310011504     |                              | Pumps            | Oil | -     | 6.07  | -     | -     | -    |
| 2310011505     |                              | Valves           | Oil | -     | 15.56 | -     | -     | -    |
| 2310011506     |                              | Other            | Oil | -     | 22.96 | -     | -     | -    |
| 2310011000     | Total: All Processes         |                  | All | 0.02  | 0.06  | 0.09  | 0.18  | -    |
| (1000 lb/spud) |                              |                  |     |       |       |       |       |      |
| 2310121700     | Completion                   |                  | Gas | -     | -     | -     | <0.01 | -    |
| 2310111700     | Completion                   |                  | Oil | 0.09  | 45.00 | 0.41  | 0.75  | -    |
| 2310111100     | Mud Degassing                |                  | Oil | -     | 25.77 | -     | -     | -    |
| 2310000220     | Drill Rigs                   |                  | All | 23.75 | 4.08  | 18.89 | 1.96  | 4.77 |
| 2310000660     | Hydraulic Fracturing Engines |                  | All | 1.37  | 0.22  | 0.86  | 0.16  | 0.17 |

**Table S4.** Emissions per unit of production (lb/Mbbl/yr) from offshore oil and gas well sites.

| Applicability                                                        | Emissions Per Unit of Production<br>(lb/Mbbl/yr) |      |                 |                 |                   |
|----------------------------------------------------------------------|--------------------------------------------------|------|-----------------|-----------------|-------------------|
|                                                                      | VOC                                              | CO   | NO <sub>x</sub> | SO <sub>2</sub> | PM <sub>2.5</sub> |
| Cuencas Del Sureste and Tampico Misantla<br>(Oil and gas production) | 825                                              | 902  | 738             | 5.56            | 10.2              |
| Tampico-Misantla<br>(Dry gas production only)                        | 32.4                                             | 40.7 | 30.9            | 0.353           | 0.217             |

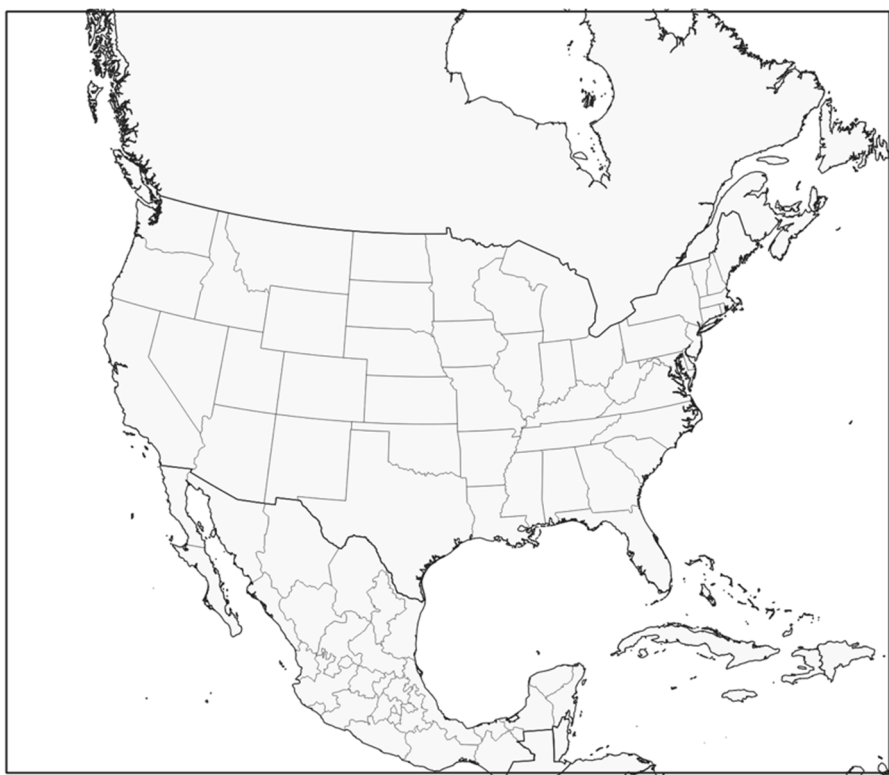

**Figure S1.** CAMx 36 km x 36 km horizontal modeling domain.

(a)

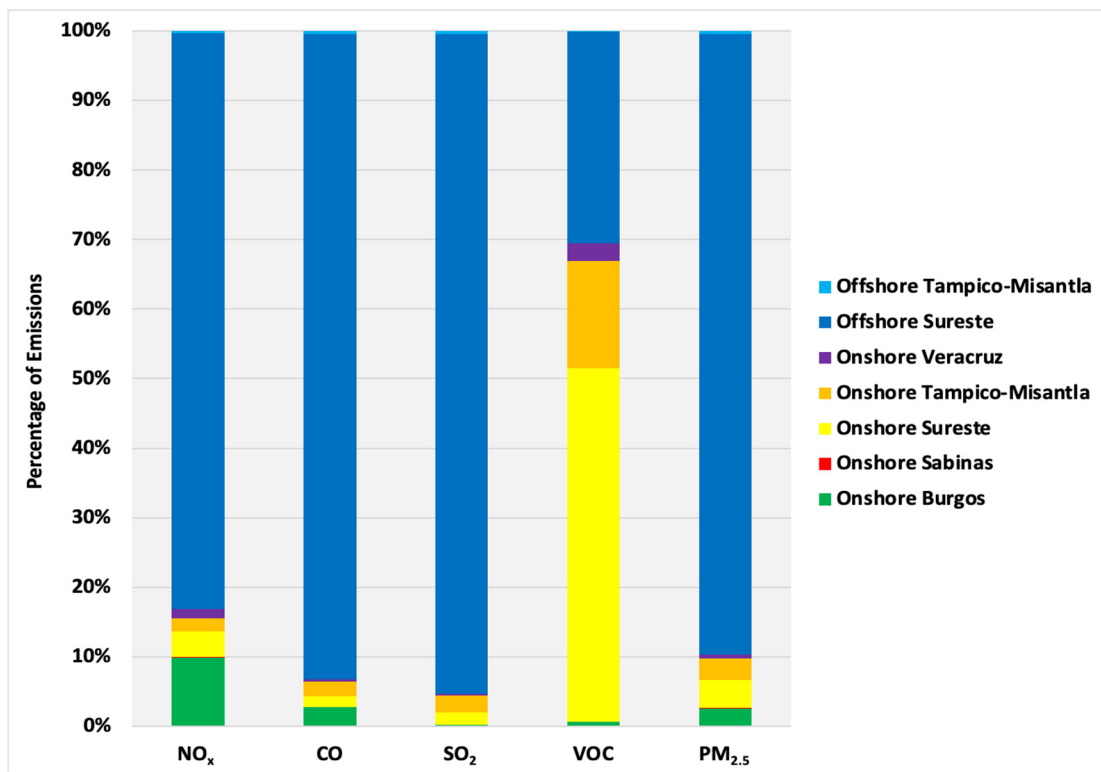

(b)

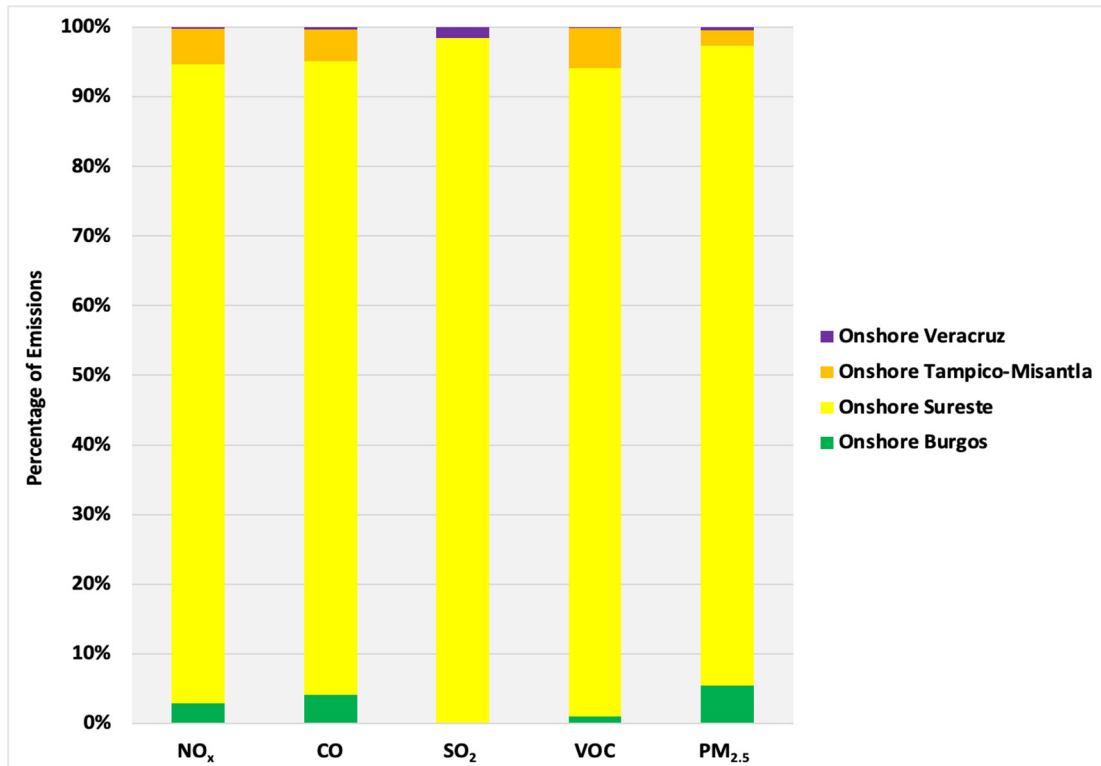

(c)

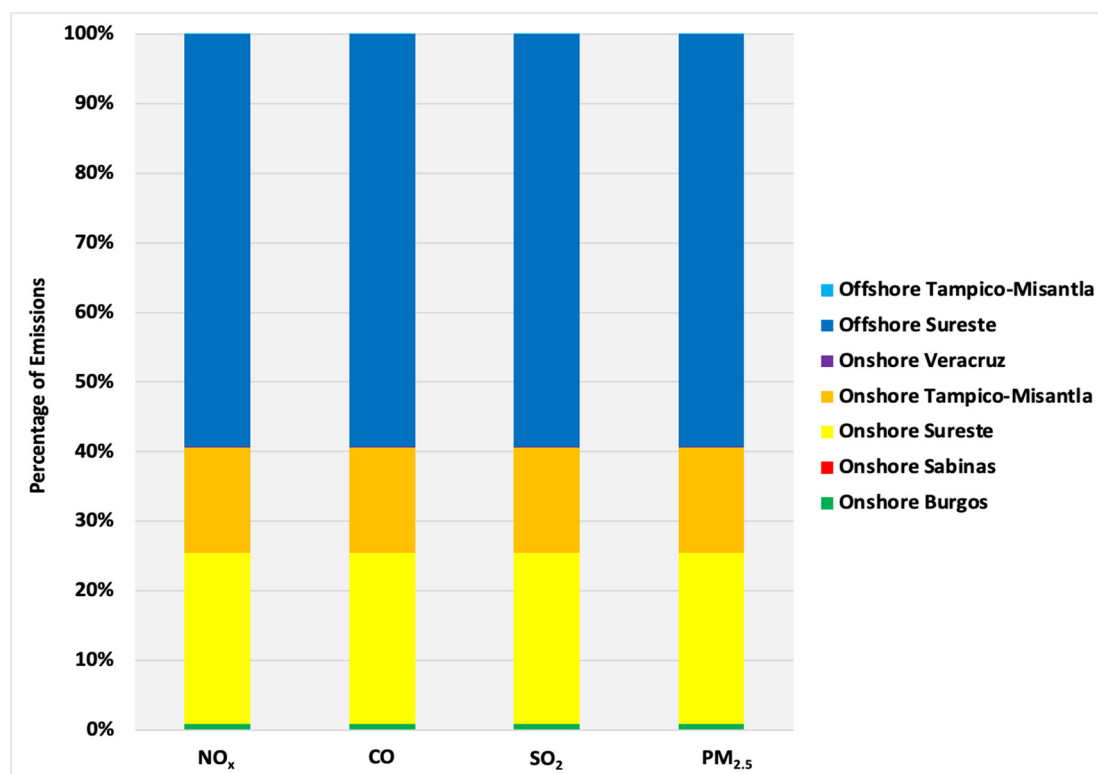

**Figure S2.** Contributions to NO<sub>x</sub>, CO, SO<sub>2</sub>, VOC, and PM<sub>2.5</sub> emissions (%) from (a) onshore and offshore well sites, (b) natural gas processing facilities, and (c) flaring by basin.

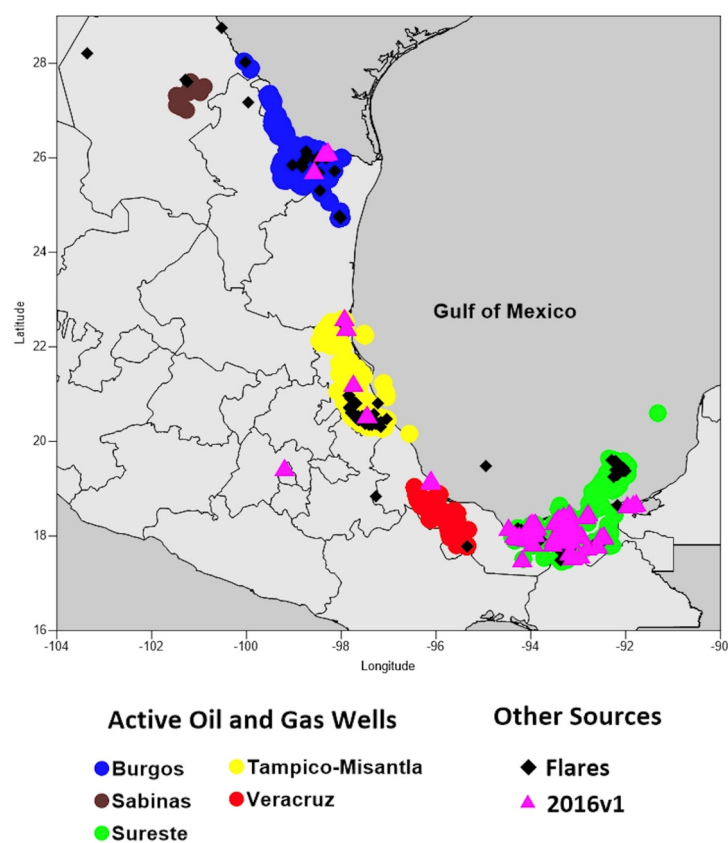

**Figure S3.** Locations of active 2016 oil and/or gas wells by basin and flaring in this study and oil and gas sector emission sources identified in the 2016v1 National Collaborative Emissions Modeling Platform.

**Table S5.** Annual emissions of CO, NO<sub>x</sub>, PM<sub>2.5</sub>, SO<sub>2</sub>, and VOC (tons) from this study and the 2016v1 inventory for oil and gas exploration and extraction, natural gas processing facilities, and natural gas compressor stations (NAICS source categories 211110, 325110, and 221210, respectively).

| Point Source Type                            | Pollutant         | 2016v1<br>(tons) | McDonald-Buller et al.<br>(tons) |
|----------------------------------------------|-------------------|------------------|----------------------------------|
| Oil and Gas<br>Exploration and<br>Extraction | CO                | 11,639           | 332,758                          |
|                                              | NO <sub>x</sub>   | 48,552           | 284,360                          |
|                                              | PM <sub>2.5</sub> | 2,093            | 3,086                            |
|                                              | SO <sub>2</sub>   | 433,054          | 74,408                           |
|                                              | VOC               | 8,160            | 867,364                          |
| Natural Gas<br>Processing<br>Facilities      | CO                | 5,847            | 6,624                            |
|                                              | NO <sub>x</sub>   | 16,122           | 18,073                           |
|                                              | PM <sub>2.5</sub> | 1,118            | 1,159                            |
|                                              | SO <sub>2</sub>   | 90,982           | 66,314                           |
|                                              | VOC               | 439              | 435                              |
| Natural Gas<br>Compressor<br>Stations        | CO                | 0                | 88,050                           |
|                                              | NO <sub>x</sub>   | 0                | 52,308                           |
|                                              | PM <sub>2.5</sub> | 0                | 459                              |
|                                              | SO <sub>2</sub>   | 0                | 14                               |
|                                              | VOC               | 0                | 698                              |

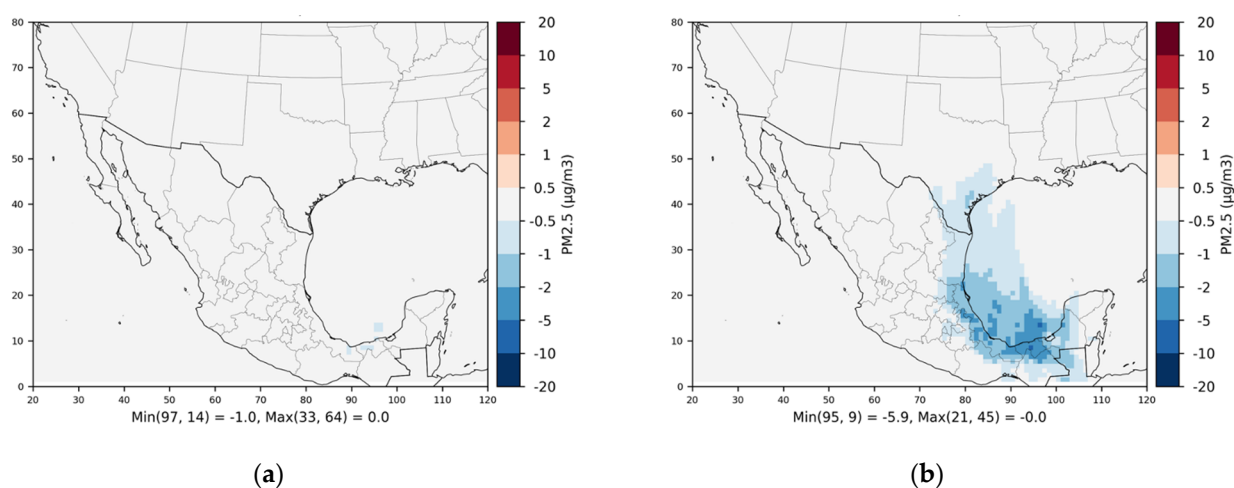

**Figure S4.** Predicted annual (a) average and (b) maximum differences in 24-hour PM<sub>2.5</sub> concentrations by grid cell when emissions from offshore well sites in the Sureste Basin are zeroed relative to the 2016 base case. Negative values indicate reductions in concentrations relative to the base case and vice versa.

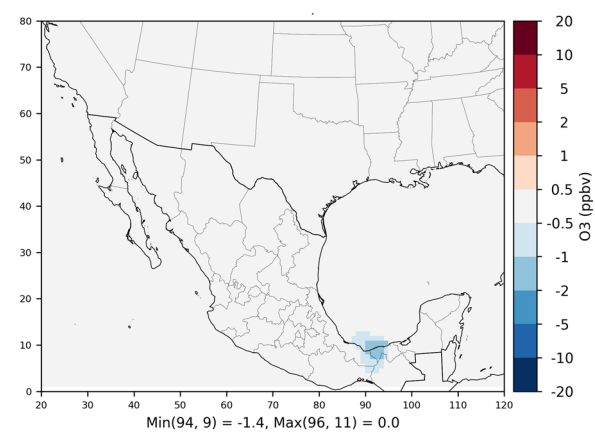

(a)

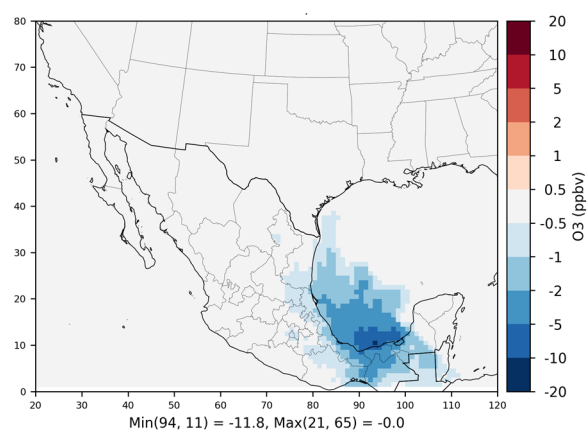

(b)

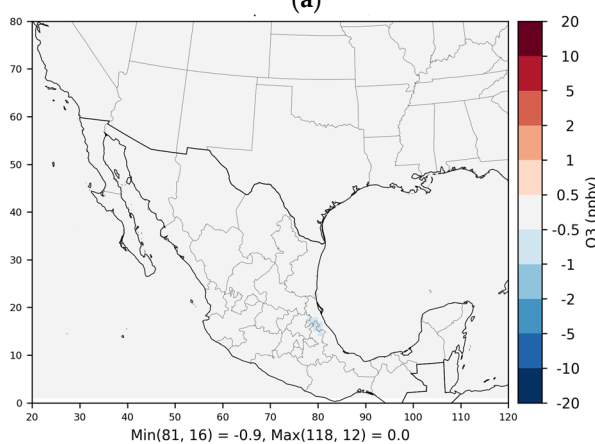

(c)

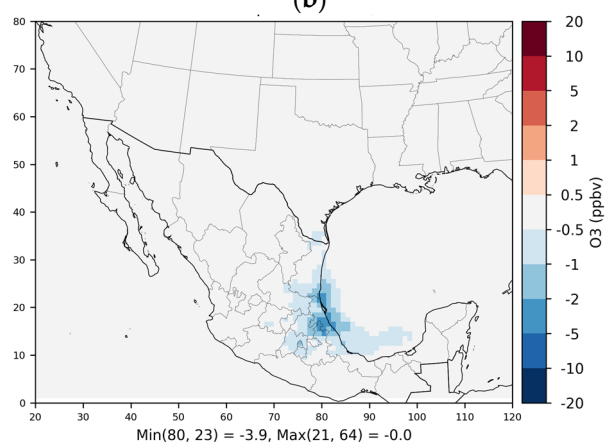

(d)

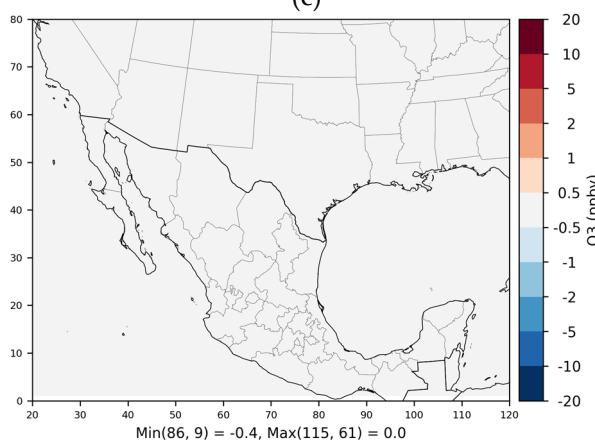

(e)

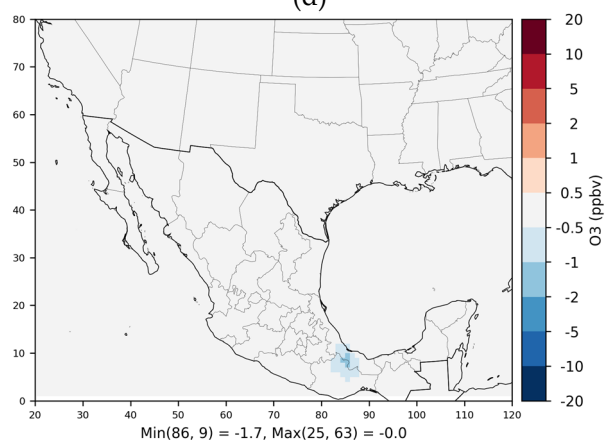

(f)

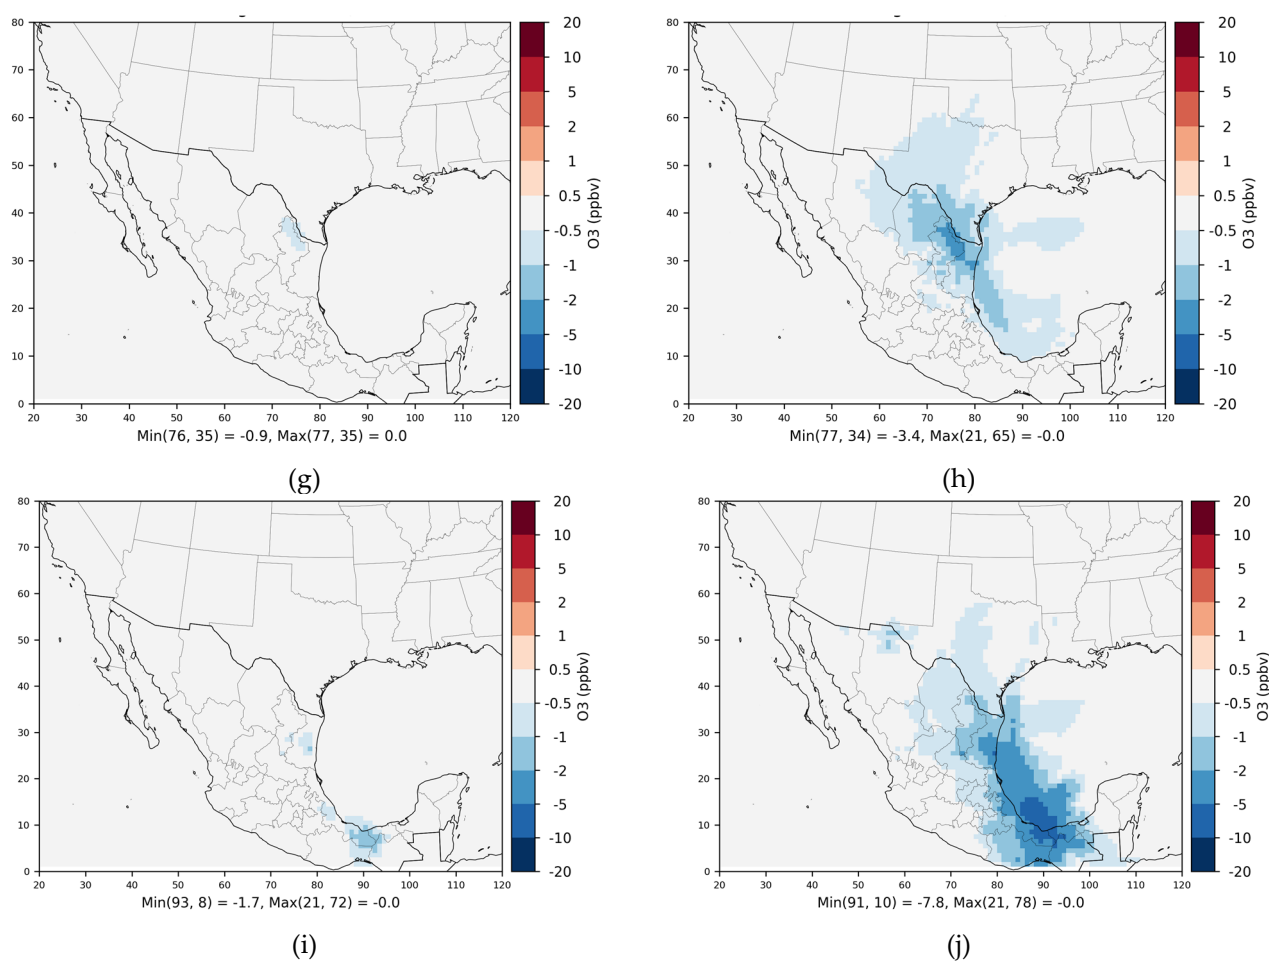

**Figure S5.** Predicted annual average differences (left) and maximum differences (right) in MDA8 ozone concentrations by grid cell when emissions from onshore well site operations in the (a/b) Sureste, (c/d) Tampico-Misantla, (e/f) Veracruz, and (g/h) Burgos and Sabinas Basins and from (i/j) midstream sources are zeroed relative to the 2016 base case. Negative values indicate reductions in concentrations relative to the base case and vice versa.
